# Supplementary material for: Target of rapamycin signaling regulates high mobility group protein association to chromatin, which functions to suppress necrotic cell death
Source: PubMed Central journal article supplement (PMC3766136; doi:10.1186/1756-8935-6-29), 2013-09-02
Supplement: 1756-8935-6-29-S3.pdf [file 1756-8935-6-29-S3.pdf]

**Additional File 3.** Cell-cycle analysis of histone H3 mutants after rapamycin treatment.

| <b>Pre-Rap</b>  | <b>% G1</b> | <b>% S</b> | <b>% G2</b> |
|-----------------|-------------|------------|-------------|
| H3WT            | 29.8        | 38.2       | 32          |
| H3T3A           | 26.2        | 44         | 29.8        |
| H3Q5A           | 28          | 34.2       | 37.8        |
| H3K14A          | 27.9        | 29.6       | 42.5        |
| H3K37A          | 31.2        | 33.1       | 35.7        |
| H3S57A          | 29.6        | 40.8       | 29.6        |
|                 |             |            |             |
| <b>1.5h Rap</b> | <b>% G1</b> | <b>% S</b> | <b>% G2</b> |
| H3WT            | 62.7        | 12.6       | 24.7        |
| H3T3A           | 58.7        | 9.3        | 32          |
| H3Q5A           | 49.8        | 20.1       | 30.1        |
| H3K14A          | 59.6        | 11.2       | 29.2        |
| H3K37A          | 72.2        | 3          | 24.8        |
| H3S57A          | 51          | 23         | 26          |
|                 |             |            |             |
| <b>4h Rap</b>   | <b>% G1</b> | <b>% S</b> | <b>% G2</b> |
| H3WT            | 52.2        | 22.6       | 25.2        |
| H3T3A           | 50.8        | 23.8       | 25.4        |
| H3Q5A           | 49          | 23         | 28          |
| H3K14A          | 52.5        | 28.7       | 18.8        |
| H3K37A          | 67.4        | 8.1        | 24.5        |
| H3S57A          | 54.7        | 19.9       | 25.5        |
