# Supplementary material for: Target of rapamycin signaling regulates high mobility group protein association to chromatin, which functions to suppress necrotic cell death
Source: PubMed Central journal article supplement (PMC3766136; doi:10.1186/1756-8935-6-29), 2013-09-02
Supplement: 1756-8935-6-29-S4.pdf [file 1756-8935-6-29-S4.pdf]

**Additional File 4.** Cell-cycle analysis of wild-type and *tco89Δ* after rapamycin treatment.

| <b>Wild-type</b>     | <b>% G1</b> | <b>% S</b> | <b>% G2</b> |
|----------------------|-------------|------------|-------------|
| Pre-Rap              | 34.2        | 13.4       | 52.4        |
| 1.5h Rap             | 69          | 2.8        | 28.2        |
| 4h Rap               | 56.4        | 14.3       | 29.3        |
|                      |             |            |             |
| <b><i>tco89Δ</i></b> | <b>% G1</b> | <b>% S</b> | <b>% G2</b> |
| Pre-Rap              | 28.7        | 15.8       | 55.5        |
| 1.5h Rap             | 46.4        | 0          | 53.6        |
| 4h Rap               | 55          | 0          | 45          |
