# Supplementary material for: Target of rapamycin signaling regulates high mobility group protein association to chromatin, which functions to suppress necrotic cell death
Source: PubMed Central journal article supplement (PMC3766136; doi:10.1186/1756-8935-6-29), 2013-09-02
Supplement: 1756-8935-6-29-S5.pdf [file 1756-8935-6-29-S5.pdf]

**Additional File 5.** Cell-cycle analysis of H3WT, H3K37A, H3K37R and H3K37Q after rapamycin treatment.

| <b>Pre-Rap</b>  | <b>% G1</b> | <b>% S</b> | <b>% G2</b> |
|-----------------|-------------|------------|-------------|
| H3WT            | 25.4        | 46.2       | 28.4        |
| H3K37A          | 31.1        | 35.5       | 33.4        |
| H3K37R          | 28.9        | 40.6       | 30.5        |
| H3K37Q          | 30.3        | 39.9       | 29.8        |
|                 |             |            |             |
| <b>1.5h Rap</b> | <b>% G1</b> | <b>% S</b> | <b>% G2</b> |
| H3WT            | 61.9        | 12.4       | 25.7        |
| H3K37A          | 68.7        | 3.2        | 28.1        |
| H3K37R          | 56.2        | 18.4       | 25.4        |
| H3K37Q          | 66.7        | 11.9       | 21.3        |
|                 |             |            |             |
| <b>4h Rap</b>   | <b>% G1</b> | <b>% S</b> | <b>% G2</b> |
| H3WT            | 54.3        | 21.5       | 24.2        |
| H3K37A          | 63.2        | 5.8        | 31          |
| H3K37R          | 53.2        | 21.8       | 25          |
| H3K37Q          | 54.6        | 23.9       | 21.5        |
