# Supplementary material for: Target of rapamycin signaling regulates high mobility group protein association to chromatin, which functions to suppress necrotic cell death
Source: PubMed Central journal article supplement (PMC3766136; doi:10.1186/1756-8935-6-29), 2013-09-02
Supplement: 1756-8935-6-29-S6.pdf [file 1756-8935-6-29-S6.pdf]

**Additional File 6.** Acetic acid induction of apoptotic and necrotic cell death. H3WT cells were grown to log phase and then either mock-treated (A) or treated with 80 mM acetic acid (B) for three hours before staining with Annexin V and PI and confocal microscopy analysis. Scale bar represents 10  $\mu\text{m}$ .

**A**

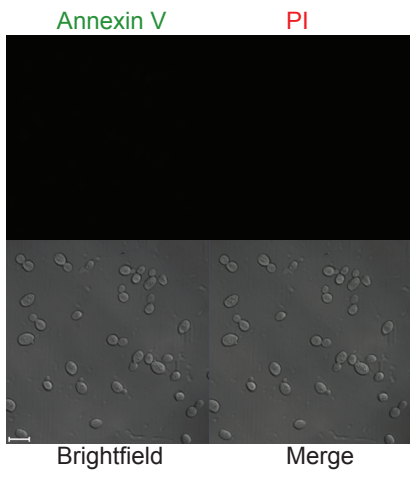

**B**

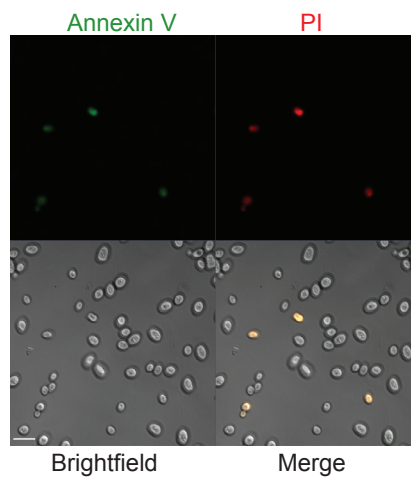

**Additional File 6.**
