# Supplementary material for: Target of rapamycin signaling regulates high mobility group protein association to chromatin, which functions to suppress necrotic cell death
Source: PubMed Central journal article supplement (PMC3766136; doi:10.1186/1756-8935-6-29), 2013-09-02
Supplement: 1756-8935-6-29-S7.pdf [file 1756-8935-6-29-S7.pdf]

**Additional File 7.** Control staining for HMG confocal analysis. A negative control H3WT strain lacking HA-tagged protein was stained as described in the Methods and analyzed by confocal microscopy to demonstrate the level of background HA staining. Scale bar represents 5  $\mu\text{m}$ .

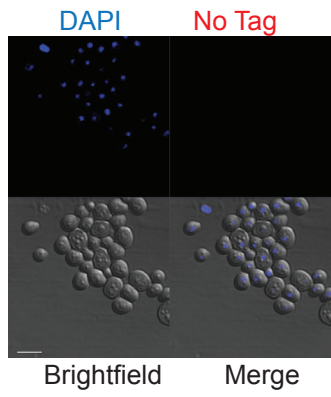

**Additional File 7.**
