# Supplementary material for: Target of rapamycin signaling regulates high mobility group protein association to chromatin, which functions to suppress necrotic cell death
Source: PubMed Central journal article supplement (PMC3766136; doi:10.1186/1756-8935-6-29), 2013-09-02
Supplement: 1756-8935-6-29-S8.pdf [file 1756-8935-6-29-S8.pdf]

**Additional File 8.** Yeast strains and plasmids.

| <b>Yeast Strain</b> | <b>Genotype</b>                                                                                                                                      | <b>Reference/Source</b> |
|---------------------|------------------------------------------------------------------------------------------------------------------------------------------------------|-------------------------|
| BY4741              | <i>MATa his3Δ1 leu2Δ met15Δ ura3Δ0</i>                                                                                                               | Open Biosystems         |
| <i>tco89Δ</i>       | BY4741; <i>tco89::KanMX</i>                                                                                                                          | Open Biosystems         |
| YNL340              | <i>MATa his3Δ200 leu2Δ0 lys2Δ0 trp1Δ63 ura3Δ0met15Δ0 can1::MFA1pr-HIS3 hht1-hhf1::NatMX4 hht2-hhf2::[HHTS-HHFS]*-ura3Δ H3WT HMO1-6XHA::HphNT1</i>    | This study              |
| YNL352 (H3K14A)     | <i>MATa his3Δ200 leu2Δ0 lys2Δ0 trp1Δ63 ura3Δ0met15Δ0 can1::MFA1pr-HIS3 hht1-hhf1::NatMX4 hht2-hhf2::[HHTS-HHFS]*-ura3Δ</i>                           | This study              |
| YNL357 (H3Q5A)      | <i>MATa his3Δ200 leu2Δ0 lys2Δ0 trp1Δ63 ura3Δ0met15Δ0 can1::MFA1pr-HIS3 hht1-hhf1::NatMX4 hht2-hhf2::[HHTS-HHFS]*-ura3Δ</i>                           | This study              |
| YNL372 (H3WT)       | <i>MATa his3Δ200 leu2Δ0 lys2Δ0 trp1Δ63 ura3Δ0met15Δ0 can1::MFA1pr-HIS3 hht1-hhf1::NatMX4 hht2-hhf2::[HHTS-HHFS]*-ura3Δ</i>                           | This study              |
| YNL374 (H3S57A)     | <i>MATa his3Δ200 leu2Δ0 lys2Δ0 trp1Δ63 ura3Δ0met15Δ0 can1::MFA1pr-HIS3 hht1-hhf1::NatMX4 hht2-hhf2::[HHTS-HHFS]*-ura3Δ</i>                           | This study              |
| YNL401 (H3T3A)      | <i>MATa his3Δ200 leu2Δ0 lys2Δ0 trp1Δ63 ura3Δ0met15Δ0 can1::MFA1pr-HIS3 hht1-hhf1::NatMX4 hht2-hhf2::[HHTS-HHFS]*-ura3Δ</i>                           | This study              |
| YNL403 (H3K37A)     | <i>MATa his3Δ200 leu2Δ0 lys2Δ0 trp1Δ63 ura3Δ0met15Δ0 can1::MFA1pr-HIS3 hht1-hhf1::NatMX4 hht2-hhf2::[HHTS-HHFS]*-ura3Δ</i>                           | This study              |
| YNL420              | <i>MATa his3Δ200 leu2Δ0 lys2Δ0 trp1Δ63 ura3Δ0met15Δ0 can1::MFA1pr-HIS3 hht1-hhf1::NatMX4 hht2-hhf2::[HHTS-HHFS]*-ura3Δ H3WT NHP10-6XHA::HphNT1</i>   | This study              |
| YNL423              | <i>MATa his3Δ200 leu2Δ0 lys2Δ0 trp1Δ63 ura3Δ0met15Δ0 can1::MFA1pr-HIS3 hht1-hhf1::NatMX4 hht2-hhf2::[HHTS-HHFS]*-ura3Δ H3K37A NHP10-6XHA::HphNT1</i> | This study              |

|                |                                                                                                                                                     |                         |
|----------------|-----------------------------------------------------------------------------------------------------------------------------------------------------|-------------------------|
| YNL439         | <i>MATa his3Δ200 leu2Δ0 lys2Δ0 trp1Δ63 ura3Δ0met15Δ0 can1::MFA1pr-HIS3 hht1-hhf1::NatMX4 hht2-hhf2::[HHTS-HHFS]*-ura3Δ H3K37A HMO1-6XHA::HphNT1</i> | This study              |
| YNL442         | <i>MATa his3Δ200 leu2Δ0 lys2Δ0 trp1Δ63 ura3Δ0met15Δ0 can1::MFA1pr-HIS3 hht1-hhf1::NatMX4 hht2-hhf2::[HHTS-HHFS]*-ura3Δ ρ-</i>                       | This study              |
| YNL445         | <i>MATa his3Δ200 leu2Δ0 lys2Δ0 trp1Δ63 ura3Δ0met15Δ0 can1::MFA1pr-HIS3 hht1-hhf1::NatMX4 hht2-hhf2::[HHTS-HHFS]*-ura3Δ ρ-</i>                       | This study              |
| <b>Plasmid</b> | <b>Description</b>                                                                                                                                  | <b>Reference/Source</b> |
| pRS415         | <i>LEU2 CEN/ARS</i>                                                                                                                                 | (1)                     |
| pRS416         | <i>CEN/ARS URA3</i>                                                                                                                                 | (1)                     |
| pRS425         | <i>LEU2 2μ</i>                                                                                                                                      | (1)                     |
| pPL155         | <i>HA3-TOR1 A1957V</i>                                                                                                                              | (2)                     |
| pPHY1299       | pRS425; <i>PDE2</i>                                                                                                                                 | (3)                     |
| pHMO1          | <i>GAL1-HMO1-6XHis/3XHA/Protein A URA3</i>                                                                                                          | Open Biosystems         |
| pNHP6A         | <i>GAL1-NHP6A-6XHis/3XHA/Protein A URA3</i>                                                                                                         | Open Biosystems         |
| pNHP10         | <i>GAL1-NHP10-6XHis/3XHA/Protein A URA3</i>                                                                                                         | Open Biosystems         |
| pABF2          | <i>GAL1-ABF2-6XHis/3XHA/Protein A URA3</i>                                                                                                          | Open Biosystems         |
| pIXR1          | <i>GAL1-IXR1-6XHis/3XHA/Protein A URA3</i>                                                                                                          | Open Biosystems         |

## References

1. Brachmann, C. B., A. Davies, G. J. Cost, E. Caputo, J. Li, P. Hieter, and J. D. Boeke. 1998. Designer deletion strains derived from *Saccharomyces cerevisiae* S288C: a useful set of strains and plasmids for PCR-mediated gene disruption and other applications. *Yeast* 14:115-132.
2. Reinke, A., J. C. Chen, S. Aronova, and T. Powers. 2006. Caffeine targets TOR complex I and provides evidence for a regulatory link between the FRB and kinase domains of Tor1p. *J Biol Chem* 281:31616-31626.
3. Howard, S. C., A. Hester, and P. K. Herman. 2003. The Ras/PKA signaling pathway may control RNA polymerase II elongation via the Spt4p/Spt5p complex in *Saccharomyces cerevisiae*. *Genetics* 165:1059-1070.
